# Supplementary material
Source: publisher figshare collection journal article supplement (https://diabetesjournals.figshare.com/ndownloader/files/25419383)
Supplement: Supplementary file 1 [file 25419383]

## Electronic Supplemental Material

This appendix has been provided by the authors to give readers additional information about their work.

Supplement to: Parviainen A, But A, Siljander H, Knip M, and the Finnish Pediatric Diabetes Register. Decreased Incidence of Type 1 Diabetes in Young Finnish Children. *Diabetes Care*

- Supplementary Figure 1
- Supplementary Figure 2
- Supplementary Figure 3
- Supplementary Table 1
- Investigators of the Finnish Pediatric Diabetes Register

Supplementary Figure 1

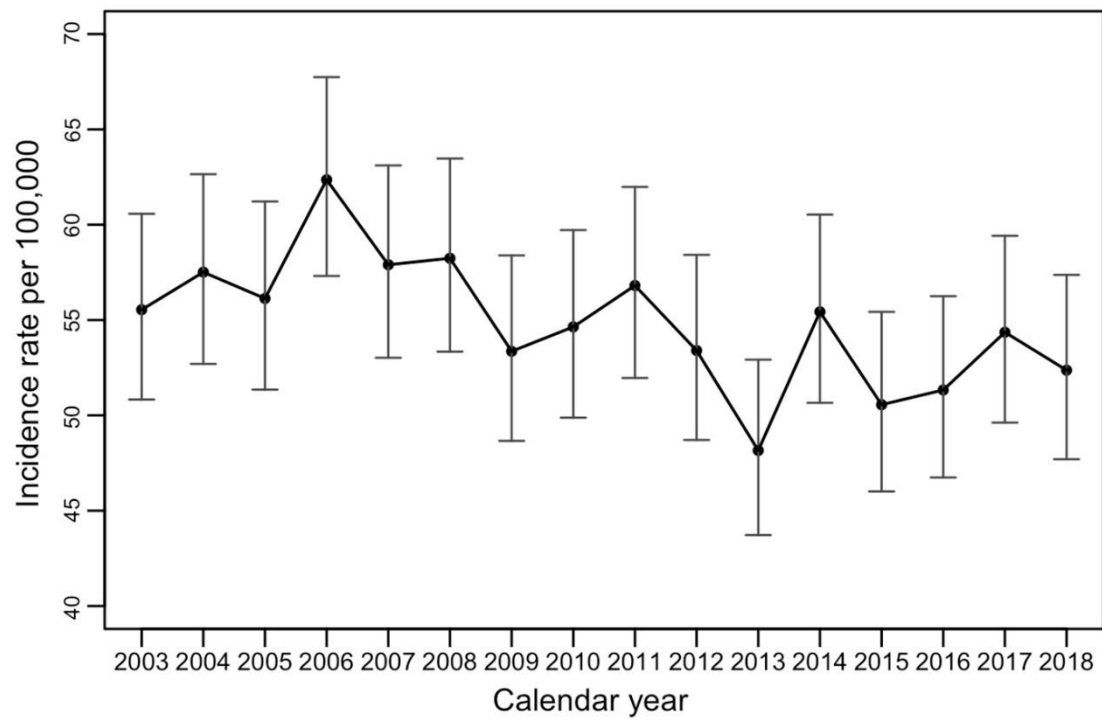

The annual incidence rates of type 1 diabetes per 100,000 person years in Finnish children under age 15 from 2003 to 2018.

Supplementary Figure 2

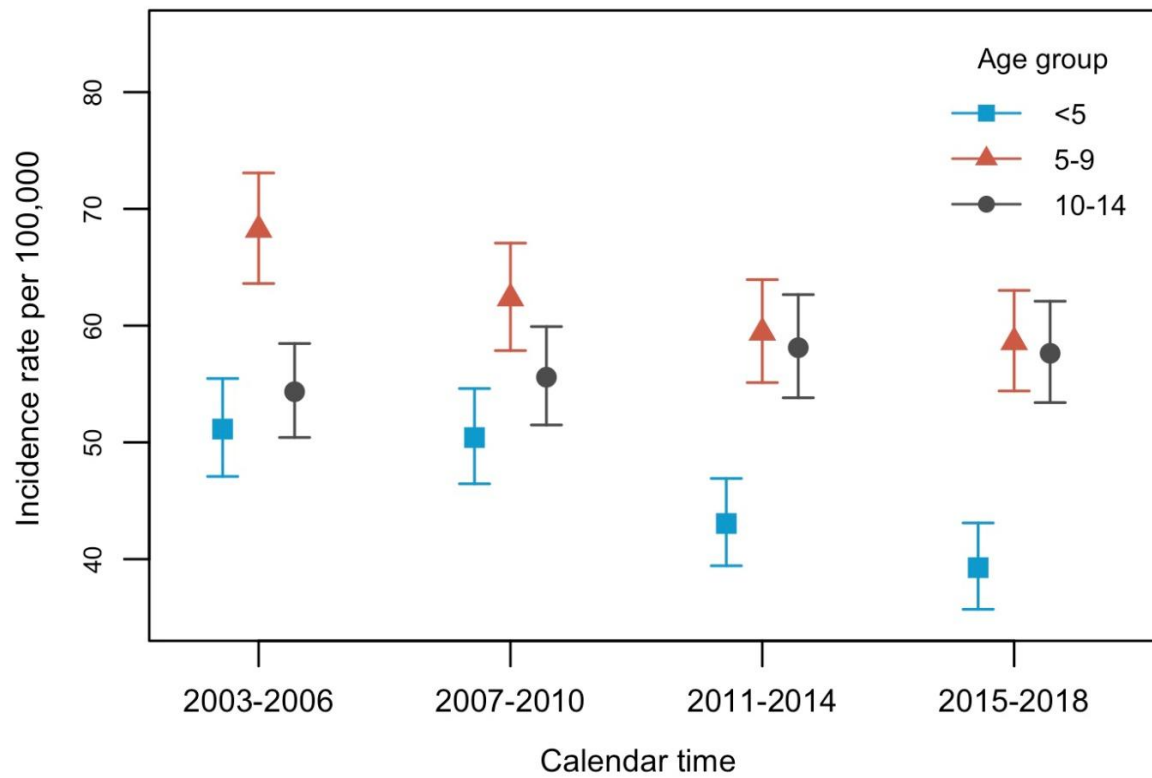

The age-specific incidence rates, with 95% CIs, of type 1 diabetes per 100,000 person years in Finnish children under age 15 during 4-year periods: blue for ages <5 years, black for ages 5-9 years, and red for ages 10-14 years.

Supplementary Figure 3

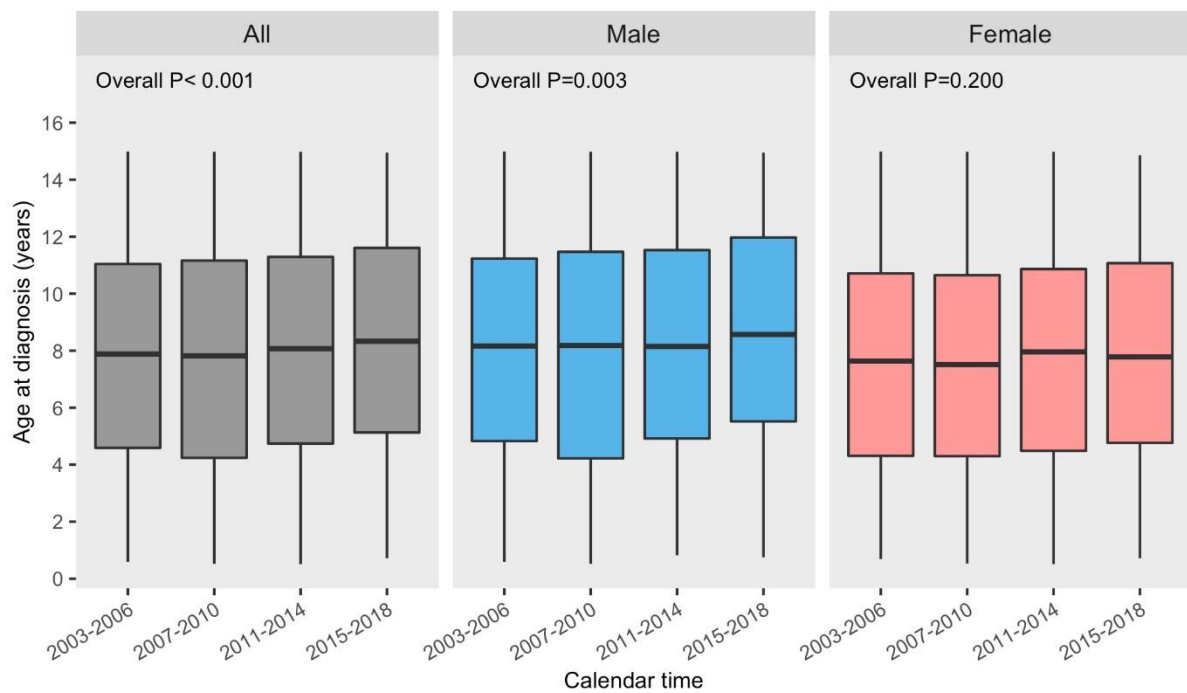

The distribution of age at diagnosis of type 1 diabetes in the whole study cohort of Finnish children under age 15 and by sex as examined by 4-year periods using boxplot (two hinges corresponding to the first and third quartiles with the median in between, and the whiskers extending from the smallest to the largest value no further than  $1.5 \times \text{IQR}$  from the hinge) and overall  $P$  values (Kruskal-Wallis test).

Supplementary Table 1

| Age group (years) | Calendar time | ALL                    |                  |          | MALE                   |                  |          | FEMALE                 |                  |          |
|-------------------|---------------|------------------------|------------------|----------|------------------------|------------------|----------|------------------------|------------------|----------|
|                   |               | IR/100,000 PY (95% CI) | IRR (95% CI)     | <i>P</i> | IR/100,000 PY (95% CI) | IRR (95% CI)     | <i>P</i> | IR/100,000 PY (95% CI) | IRR (95% CI)     | <i>P</i> |
| 0–6               | 2003–2006     | 55.9 (52.3–59.7)       | 1                | NA       | 58.65 (53.5–64.1)      | 1                | NA       | 53.1 (48.1–58.4)       | 1                | NA       |
|                   | 2007–2010     | 52.9 (49.4–56.5)       | 0.95 (0.86–1.04) | 0.2415   | 55.4 (50.5–60.6)       | 0.94 (0.83–1.07) | 0.3758   | 50.3 (45.5–55.4)       | 0.95 (0.83–1.09) | 0.4433   |
|                   | 2011–2014     | 46.9 (43.7–50.3)       | 0.84 (0.76–0.92) | 0.0003   | 51.7 (47.1–56.8)       | 0.88 (0.78–1.00) | 0.0564   | 41.9 (37.6–46.5)       | 0.79 (0.68–0.91) | 0.0012   |
|                   | 2015–2018     | 46.2 (43.0–49.7)       | 0.83 (0.75–0.91) | 0.0001   | 47.3 (42.7–52.2)       | 0.81 (0.71–0.92) | 0.0016   | 45.1 (40.5–50.0)       | 0.85 (0.74–0.98) | 0.0243   |
| 7–14              | 2003–2006     | 59.4 (56.1–62.8)       | 1                | NA       | 67.3 (62.4–72.4)       | 1                | NA       | 51.2 (46.9–55.9)       | 1                | NA       |
|                   | 2007–2010     | 58.8 (55.4–62.3)       | 0.99 (0.91–1.07) | 0.7921   | 66.2 (61.2–71.5)       | 0.98 (0.88–1.10) | 0.7689   | 51.0 (46.5–55.8)       | 1.00 (0.88–1.13) | 0.9437   |
|                   | 2011–2014     | 59.3 (55.9–62.9)       | 1.00 (0.92–1.08) | 0.9756   | 65.1 (60.1–70.4)       | 0.97 (0.87–1.08) | 0.5583   | 53.3 (48.7–58.2)       | 1.04 (0.92–1.18) | 0.5390   |
|                   | 2015–2018     | 57.1 (53.8–60.6)       | 0.96 (0.89–1.04) | 0.3414   | 66.4 (61.4–71.7)       | 0.99 (0.89–1.10) | 0.8147   | 47.4 (43.1–52.0)       | 0.92 (0.81–1.05) | 0.2252   |

Incidence rates (IR) per 100,000 person years (PY) and incidence rate ratios (IRRs) of type 1 diabetes in Finnish children aged 0–6 and 7–14 years from 2003 to 2018.

The Finnish Pediatric Diabetes Register comprises the following investigators:

**Principal Investigator:** Mikael Knip (Children's Hospital, Helsinki University Hospital)

**Steering Committee:** Per-Henrik Groop (Folkhälsan Research Center), Jorma Ilonen (Immunogenetics Laboratory, University of Turku), Timo Otonkoski (Children's Hospital, Helsinki University Hospital), Riitta Veijola (Department of Pediatrics, Oulu University Hospital).

**Locally responsible investigators:**

Alar Abram (Department of Pediatrics, Kanta-Häme Central Hospital), Henrikka Aito (Department of Pediatrics, HUS Porvoo Hospital), Ivan Arkhipov (Department of Pediatrics, Mehiläinen Länsi-Pohja Central Hospital), Elina Blanco-Sequeiros (Department of Pediatrics, Central Ostrobothnia Central Hospital), Jonas Bondestam (Department of Pediatrics, HUS Lohja Hospital), Markus Granholm (Department of Pediatrics, Jakobstad Hospital), Maarit Haapalehto-Ikonen (Department of Pediatrics, Rauma Hospital), Torsten Horn (Department of Pediatrics, Central Hospital of Central Finland), Hanna Huopio (Department of Pediatrics, Kuopio University Hospital), Joakim Janer (Department of Pediatrics, HUS Raasepori Hospital), Christian Johansson (Department of Pediatrics, Åland Central Hospital), Liisa Kalliokoski (Department of Pediatrics, Kainuu Central Hospital), Päivi Keskinen (Department of Pediatrics, Tampere University Hospital), Anne Kinnala (Department of Pediatrics, Turku University Central Hospital), Maarit Korteniemi (Department of Pediatrics, Central Hospital of Lapland), Hanne Laakkonen (Department of Pediatrics, HUS Hyvinkää Hospital), Jyrki Lähde (Department of Pediatrics, Satakunta Central Hospital), Päivi Miettinen (HUS New Children's Hospital), Päivi Nykänen (Department of Pediatrics, Mikkeli Central Hospital), Erik Popov

(Department of Pediatrics, Vaasa Central Hospital), Mari Pulkkinen (Department of Pediatrics, HUS Jorvi Hospital), Maria Salonen (Department of Pediatrics, Kymenlaakso Central Hospital), Pia Salonen (Department of Pediatrics, Päijät-Häme Central Hospital), Juhani Sankala (Department of Pediatrics, Savonlinna Central Hospital), Virpi Sidoroff (Department of Pediatrics, North Karelia Central Hospital), Anne-Maarit Suomi (Department of Pediatrics, South Ostrobothnia Central Hospital), Tuula Tiainen (Department of Pediatrics, South Karelia Central Hospital), Riitta Veijola (Department of Pediatrics, Oulu University Hospital)
